# Supplementary figures and images for: Predictive value of procalcitonin decrease in patients with severe sepsis: a prospective observational study
Source: Springer Nature journal article supplement (doi:10.1186/cc9327), 2010-11-15

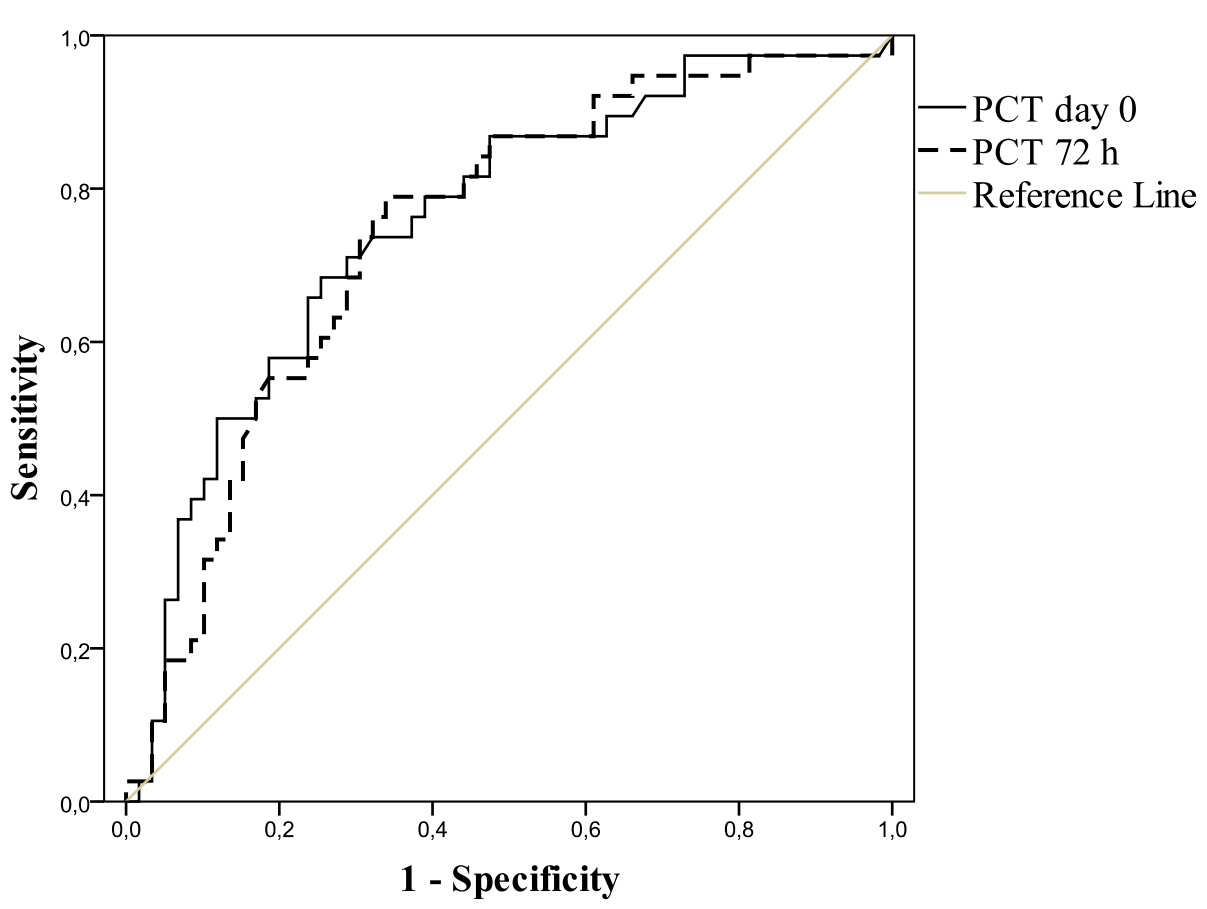

Supplement: 13054_2010_8817_MOESM3_ESM.pdf [file 13054_2010_8817_MOESM3_ESM.pdf]
